# Supplementary material for: A self-assembly based on a hydrogel interface: facile, rapid, and large-scale preparation of colloidal photonic crystals
Source: Royal Society of Chemistry journal article supplement (doi:10.1039/d0qm00266f), 2020-01-01
Supplement: d0qm00266f1.pdf [file d0qm00266f1.pdf]

Electronic Supplementary Material (ESI) for Materials Chemistry Frontiers.  
This journal is © The Royal Society of Chemistry 2020

## Supporting information

# Self-Assembly Based on Hydrogel Interface: Rapid and Large-Scale Preparation of Colloidal Photonic Crystals Made Easy

Mengfan Wu,<sup>a</sup> Chuyan Zhang,<sup>b</sup> Fujing Wei,<sup>a</sup> Huifang An,<sup>a</sup> Xiaqing Wang,<sup>a</sup> Dan Li,<sup>a</sup> Haoyu Wang,<sup>a</sup> Kexiong Wen,<sup>a</sup> Qingyu Lin<sup>a</sup> and Yixiang Duan<sup>\*a</sup>

a A Research Center of Analytical Instrumentation, Key Laboratory of Bio-Resource and Eco-Environment of Ministry of Education, College of Life Sciences, Sichuan University, Chengdu 610064, Sichuan, PR China.

b West China School of Public Health and West China Fourth Hospital, Sichuan University, Chengdu 610041, P. R. China

\* Corresponding Author

Prof. Yixiang Duan, E-mail: [yduan@scu.edu.cn](mailto:yduan@scu.edu.cn)

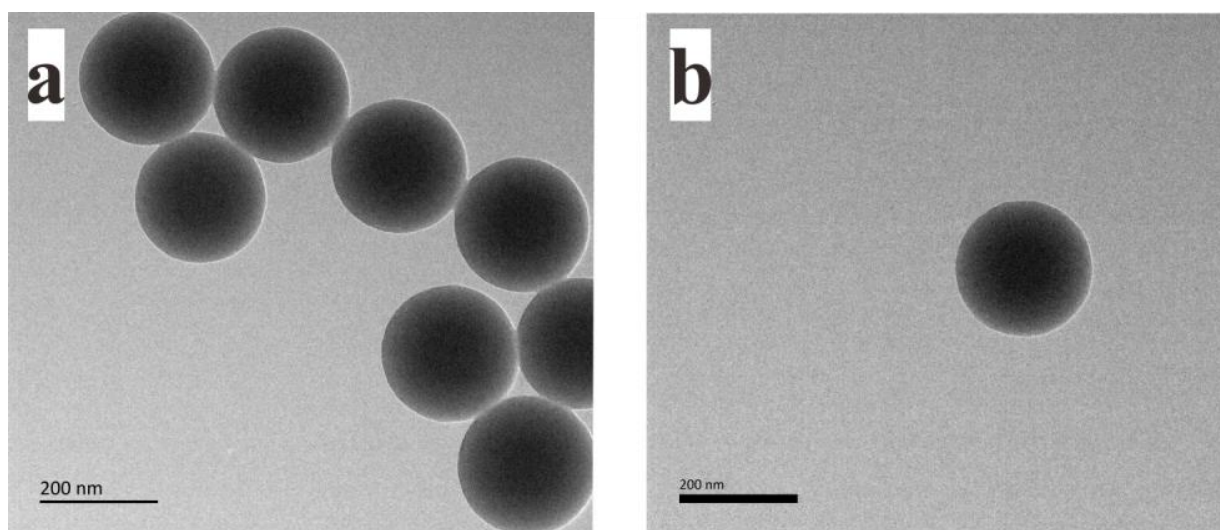

**Figure S1.** TEM image of monodisperse PS nanoparticles with diameters of 246 nm.

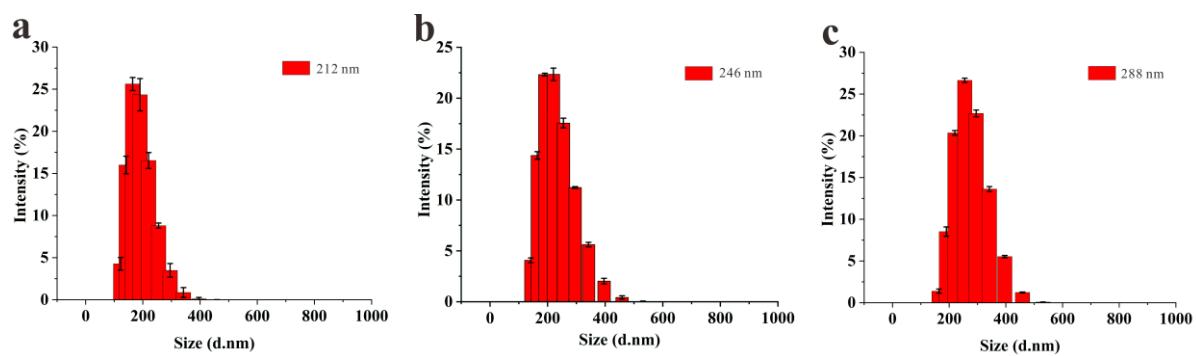

**Figure S2.** Monodispersed latex spheres polystyrene (PS) with diameter of 212 nm (a), 246 nm (b) and 288 nm (c) obtained by dynamic light scattering (DSL) analysis using a Malvern Zetasizer Nano ZS90.

As shown in Figure S2, the polydispersity index (PDI) for size 212, 246 and 288 nm PS nanoparticles are 0.05, 0.07 and 0.02, respectively.

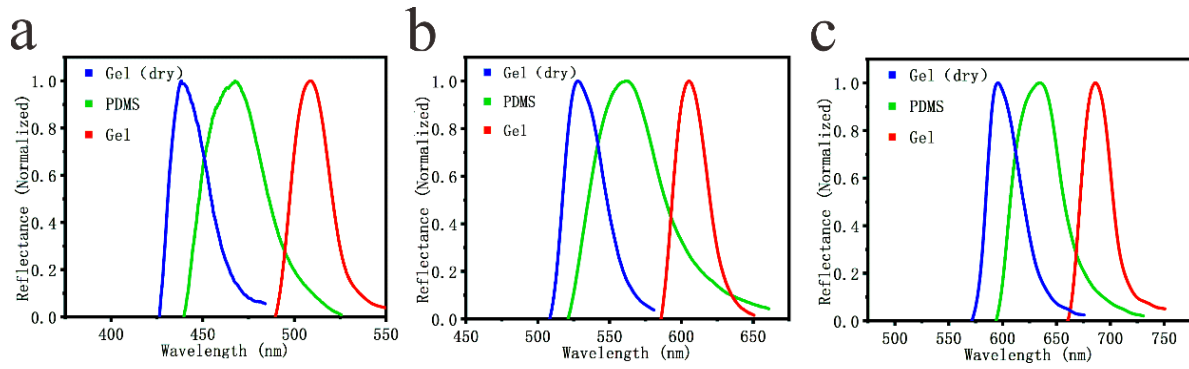

**Figure S3.** The normalized reflection spectra of PCs assembled by PS nanoparticles with diameters of (a) 212 nm, (b) 246 nm, and (c) 288 nm on the substrates materials of PDMS and hydrogel.
